# Supplementary material for: Transcriptomic Analysis of Myocardial Ischemia Using the Blood of Rat
Source: PLoS One. 2015 Nov 5;10(11):e0141915. doi: 10.1371/journal.pone.0141915 (PMC4634849; doi:10.1371/journal.pone.0141915)
Supplement: S1 Table — (XLS) [file pone.0141915.s004.xls]

## Sheet: Supplementary Table 1
geneID	Length	Control -RPKM	Case -RPKM	log2 Ratio	Up-Down	P-value	FDR
ENSRNOG00000000012	588	12.7807	27.4772	1.10428	Up	2.29812e-09	1.91774e-08
ENSRNOG00000000033	2351	27.6651	80.768	1.54572	Up	3.08382e-156	5.061e-154
ENSRNOG00000000108	1182	7.19047	15.2047	1.08036	Up	5.92454e-10	5.27053e-09
ENSRNOG00000000137	936	3.24978	6.88514	1.08314	Up	0.000213202	0.000868407
ENSRNOG00000000167	936	21.3147	58.6692	1.46075	Up	7.1711e-43	3.31322e-41
ENSRNOG00000000257	5032	0.835619	1.73165	1.05123	Up	2.57556e-05	0.000125357
ENSRNOG00000000455	2349	4.53226	9.93072	1.13167	Up	2.33516e-13	2.82786e-12
ENSRNOG00000000460	1070	6.93978	14.421	1.05521	Up	1.83411e-08	1.39327e-07
ENSRNOG00000000502	1893	0.850693	2.30155	1.4359	Up	0.000153902	0.000644702
ENSRNOG00000000521	736	27.593	60.6761	1.13683	Up	2.33958e-24	5.61036e-23
ENSRNOG00000000525	734	11.3354	36.6038	1.69115	Up	1.33626e-26	3.55621e-25
ENSRNOG00000000640	2956	0.121062	2.21085	4.19078	Up	1.14558e-17	1.86068e-16
ENSRNOG00000000711	1005	4.36195	10.8379	1.31304	Up	1.90715e-08	1.44527e-07
ENSRNOG00000000768	666	3.08962	8.04097	1.37994	Up	4.526e-05	0.000210283
ENSRNOG00000000777	1105	17.4071	38.9356	1.16141	Up	2.74104e-24	6.55312e-23
ENSRNOG00000000782	2331	0	0.973483	9.92701	Up	2.46788e-08	1.8471e-07
ENSRNOG00000000801	1460	2.20598	5.40875	1.29388	Up	2.30076e-06	1.32973e-05
ENSRNOG00000000824	4232	5.03133	10.7454	1.09471	Up	2.09852e-23	4.764e-22
ENSRNOG00000000827	1073	9.92198	21.1481	1.09183	Up	2.20256e-12	2.45586e-11
ENSRNOG00000000906	1156	8.43567	22.2993	1.40242	Up	8.09446e-20	1.4933e-18
ENSRNOG00000000907	934	6.60927	15.6462	1.24325	Up	4.25582e-10	3.85569e-09
ENSRNOG00000001130	3239	0.745768	2.55012	1.77377	Up	1.07345e-09	9.25179e-09
ENSRNOG00000001187	1980	1.03924	5.45522	2.39212	Up	2.42428e-17	3.85026e-16
ENSRNOG00000001189	4093	6.05465	43.776	2.85402	Up	0	0
ENSRNOG00000001192	1647	7.76772	17.3599	1.1602	Up	1.24294e-16	1.88656e-15
ENSRNOG00000001224	3151	3.32192	9.41954	1.50364	Up	6.75646e-25	1.67899e-23
ENSRNOG00000001254	3516	90.9658	182.697	1.00605	Up	3.55456e-268	1.01822e-265
ENSRNOG00000001300	1911	5.7115	12.9668	1.18288	Up	5.04956e-15	7.04034e-14
ENSRNOG00000001302	2485	6.94836	16.1811	1.21957	Up	1.63156e-24	3.95464e-23
ENSRNOG00000001369	1459	5.15081	10.7627	1.06317	Up	1.11947e-08	8.70975e-08
ENSRNOG00000001376	530	14.6857	33.2243	1.17783	Up	5.01378e-11	5.00267e-10
ENSRNOG00000001414	3063	8.9377	45.6357	2.35219	Up	1.05086e-201	2.20751e-199
ENSRNOG00000001469	2633	9.98959	23.9243	1.25998	Up	2.31044e-39	9.73288e-38
ENSRNOG00000001470	3258	2.11442	5.12622	1.27764	Up	9.00152e-12	9.55653e-11
ENSRNOG00000001555	1322	5.27855	12.084	1.19489	Up	2.46954e-10	2.30495e-09
ENSRNOG00000001607	4368	15.5457	56.8544	1.87076	Up	2.53282e-266	7.12582e-264
ENSRNOG00000001728	1278	17.0809	37.3582	1.12904	Up	1.15641e-25	2.93859e-24
ENSRNOG00000001750	3293	1.1954	2.70125	1.17614	Up	3.23778e-06	1.82509e-05
ENSRNOG00000001843	3389	3.511	10.124	1.52782	Up	3.56234e-29	1.0471e-27
ENSRNOG00000001958	2548	1.7907	3.88291	1.11662	Up	2.46092e-06	1.41606e-05
ENSRNOG00000001989	2868	3.93045	8.32352	1.0825	Up	8.564e-13	9.90645e-12
ENSRNOG00000002045	1451	31.3835	64.1816	1.03215	Up	3.92968e-42	1.75388e-40
ENSRNOG00000002188	1887	2.18091	5.72408	1.39212	Up	4.82902e-09	3.9016e-08
ENSRNOG00000002217	730	6.37282	14.1747	1.15331	Up	7.5865e-07	4.67993e-06
ENSRNOG00000002305	3940	1.22616	2.55716	1.06039	Up	5.12668e-06	2.8104e-05
ENSRNOG00000002309	2112	6.81998	23.2076	1.76676	Up	4.47266e-50	2.48999e-48
ENSRNOG00000002331	1748	1.17717	5.50421	2.22522	Up	2.05222e-14	2.70793e-13
ENSRNOG00000002434	1396	11.2792	29.1939	1.372	Up	1.76892e-29	5.2683e-28
ENSRNOG00000002439	1236	0.579059	2.49684	2.10832	Up	3.43314e-05	0.000163214
ENSRNOG00000002480	1346	4.25389	8.56425	1.00954	Up	2.77984e-06	1.58855e-05
ENSRNOG00000002488	1812	4.39423	11.1706	1.34603	Up	5.19602e-15	7.23174e-14
ENSRNOG00000002525	2811	0.254613	5.16642	4.34279	Up	1.29039e-38	5.32203e-37
ENSRNOG00000002723	3566	0.852999	1.80721	1.08314	Up	0.000213202	0.000868631
ENSRNOG00000002746	2256	75.6642	162.022	1.0985	Up	6.26496e-177	1.18921e-174
ENSRNOG00000002776	1578	0.793729	2.81851	1.82821	Up	5.41334e-06	2.9552e-05
ENSRNOG00000002792	1073	0	5.32931	12.3797	Up	6.81464e-20	1.26311e-18
ENSRNOG00000002802	926	0.772912	15.8794	4.36071	Up	3.49812e-39	1.46188e-37
ENSRNOG00000002810	2043	5.34248	13.2397	1.30929	Up	8.31882e-19	1.45142e-17
ENSRNOG00000002837	1521	19.9398	118.219	2.56773	Up	1.02438e-286	3.22782e-284
ENSRNOG00000002881	3507	17.5001	35.5099	1.02086	Up	8.75736e-55	5.43198e-53
ENSRNOG00000002946	678	3.56275	20.6168	2.53276	Up	1.9659e-23	4.46937e-22
ENSRNOG00000002978	1623	0.220492	1.90148	3.10832	Up	2.67272e-07	1.76408e-06
ENSRNOG00000002997	2110	46.0467	95.3274	1.04979	Up	2.22298e-91	2.21665e-89
ENSRNOG00000003138	1647	17.328	43.3722	1.32367	Up	8.27764e-48	4.24802e-46
ENSRNOG00000003172	1291	41.8564	84.2992	1.01007	Up	2.71146e-47	1.38249e-45
ENSRNOG00000003221	2051	0.39258	1.59319	2.02086	Up	3.29542e-05	0.000157427
ENSRNOG00000003232	1492	3.35792	6.93532	1.04639	Up	4.84768e-06	2.66673e-05
ENSRNOG00000003242	2763	4.40361	9.09975	1.04714	Up	9.06354e-13	1.04536e-11
ENSRNOG00000003259	1526	10.4356	24.0897	1.2069	Up	3.3358e-22	7.09251e-21
ENSRNOG00000003298	1689	1.00641	3.22442	1.67982	Up	2.0005e-06	1.16431e-05
ENSRNOG00000003300	2519	19.6403	103.307	2.39505	Up	0	0
ENSRNOG00000003312	1658	1.94254	5.31028	1.45085	Up	5.1221e-08	3.69161e-07
ENSRNOG00000003348	1595	1.40227	9.73119	2.79486	Up	1.20485e-28	3.48302e-27
ENSRNOG00000003357	4765	577.568	1184.42	1.03611	Up	0	0
ENSRNOG00000003363	2754	0.48728	1.41721	1.54023	Up	0.000163883	0.0006827
ENSRNOG00000003365	2222	17.0715	44.1991	1.37242	Up	1.1051e-68	8.4519e-67
ENSRNOG00000003443	1514	0.945465	5.27579	2.48029	Up	1.09764e-13	1.37031e-12
ENSRNOG00000003486	1595	8.9745	18.6088	1.05208	Up	6.50834e-15	9.01045e-14
ENSRNOG00000003492	2471	9.3049	21.0113	1.17511	Up	1.70432e-29	5.08552e-28
ENSRNOG00000003496	5798	1.88249	3.85112	1.03264	Up	2.83914e-11	2.89519e-10
ENSRNOG00000003510	2010	20.5635	45.2031	1.13634	Up	8.16314e-48	4.20295e-46
ENSRNOG00000003517	1956	3.7963	7.84239	1.0467	Up	2.5e-08	1.86936e-07
ENSRNOG00000003538	2535	0.423501	1.39642	1.7213	Up	0.000103472	0.000450208
ENSRNOG00000003553	1904	9.30356	20.3083	1.12621	Up	5.26122e-21	1.03613e-19
ENSRNOG00000003572	3920	21.5445	44.4344	1.04436	Up	1.00073e-78	8.80814e-77
ENSRNOG00000003620	1885	19.0794	45.2152	1.24479	Up	1.07592e-51	6.27822e-50
ENSRNOG00000003622	1716	6.72548	17.4553	1.37595	Up	3.56428e-22	7.53761e-21
ENSRNOG00000003666	1237	0	1.32079	10.3672	Up	3.32346e-06	1.87004e-05
ENSRNOG00000003687	1598	10.2453	24.8787	1.27995	Up	4.89036e-26	1.26723e-24
ENSRNOG00000003705	2843	1.10139	2.45835	1.15836	Up	4.66108e-05	0.000215986
ENSRNOG00000003730	606	2.3621	7.33929	1.63557	Up	2.583e-05	0.000125641
ENSRNOG00000003736	4465	39.8734	80.8268	1.01941	Up	7.39782e-155	1.18931e-152
ENSRNOG00000003745	1894	1.79496	30.767	4.09936	Up	7.99116e-145	1.18774e-142
ENSRNOG00000003778	1294	0.760518	2.66551	1.80936	Up	7.32264e-05	0.000326915
ENSRNOG00000003895	1292	0.484715	6.53358	3.75266	Up	7.77266e-21	1.51745e-19
ENSRNOG00000003924	1689	3.54892	7.5774	1.09432	Up	1.31931e-07	9.12452e-07
ENSRNOG00000003959	708	3.79087	16.1535	2.09125	Up	1.02848e-15	1.49481e-14
ENSRNOG00000003977	1936	36.6916	207.181	2.49737	Up	0	0
ENSRNOG00000004009	3175	2.47965	5.43176	1.13128	Up	3.06022e-10	2.81952e-09
ENSRNOG00000004052	1389	14.5565	31.9549	1.13437	Up	3.85816e-24	9.05891e-23
ENSRNOG00000004063	2721	2.23579	5.43738	1.28213	Up	1.22467e-10	1.17794e-09
ENSRNOG00000004192	3672	3.02114	6.3033	1.06102	Up	4.27384e-12	4.64375e-11
ENSRNOG00000004217	5025	6.21356	12.7707	1.03934	Up	7.14396e-30	2.15619e-28
ENSRNOG00000004249	3466	1.23898	2.54023	1.03581	Up	2.92488e-05	0.000140879
ENSRNOG00000004282	1119	8.79455	27.1735	1.62752	Up	2.16756e-28	6.18658e-27
ENSRNOG00000004414	1876	12.0653	24.6756	1.03222	Up	9.12742e-22	1.8847e-20
ENSRNOG00000004441	1512	5.97614	12.8467	1.10412	Up	5.62808e-11	5.60496e-10
ENSRNOG00000004444	2023	2.29963	5.2944	1.20306	Up	1.947e-07	1.30978e-06
ENSRNOG00000004454	4035	0.221721	1.05727	2.25352	Up	3.41474e-07	2.22771e-06
ENSRNOG00000004479	2410	0.593956	1.99613	1.74878	Up	4.41564e-06	2.44529e-05
ENSRNOG00000004500	2109	1.8665	6.49877	1.79983	Up	1.8376e-15	2.62479e-14
ENSRNOG00000004540	706	16.6004	36.5127	1.13718	Up	1.03648e-14	1.40896e-13
ENSRNOG00000004575	1933	0.370262	3.24002	3.12938	Up	1.11036e-13	1.38509e-12
ENSRNOG00000004613	2209	4.6575	9.86157	1.08226	Up	8.50692e-12	9.0681e-11
ENSRNOG00000004649	1329	1.21171	8.94699	2.88436	Up	5.62946e-23	1.25449e-21
ENSRNOG00000004687	1734	31.7305	64.7517	1.02905	Up	3.36502e-50	1.88669e-48
ENSRNOG00000004699	654	5.74543	16.6546	1.53543	Up	2.54658e-10	2.37124e-09
ENSRNOG00000004712	1938	20.5427	46.3205	1.17302	Up	1.22796e-49	6.74096e-48
ENSRNOG00000004783	2472	3.22101	7.04991	1.13009	Up	2.55696e-10	2.37809e-09
ENSRNOG00000004854	4174	1.09312	2.71824	1.31422	Up	9.4178e-09	7.38564e-08
ENSRNOG00000004860	6057	59.8203	125.054	1.06385	Up	0	0
ENSRNOG00000004861	3736	3.13701	6.55975	1.06425	Up	8.86894e-13	1.02441e-11
ENSRNOG00000004928	2216	0.0413805	0.655361	3.98527	Up	0.000128966	0.000549449
ENSRNOG00000005118	573	0	2.0593	11.0079	Up	0.00011028	0.000477585
ENSRNOG00000005188	3784	0.685643	1.75107	1.3527	Up	7.64792e-06	4.08036e-05
ENSRNOG00000005214	1644	1.68698	5.35551	1.66658	Up	1.66179e-09	1.40233e-08
ENSRNOG00000005227	2135	1.1314	2.63587	1.22017	Up	0.000143048	0.000602922
ENSRNOG00000005370	2277	0.432196	1.87355	2.11602	Up	9.45102e-07	5.74685e-06
ENSRNOG00000005480	1840	84.7482	171.028	1.01298	Up	6.66632e-134	9.21297e-132
ENSRNOG00000005574	2715	0.593135	1.97248	1.73358	Up	1.44532e-06	8.59282e-06
ENSRNOG00000005600	2566	1.35975	9.37389	2.78531	Up	2.05788e-43	9.59228e-42
ENSRNOG00000005621	1486	2.64902	6.78008	1.35584	Up	3.0463e-08	2.24588e-07
ENSRNOG00000005639	4128	3.03417	6.53051	1.1059	Up	1.03976e-14	1.41219e-13
ENSRNOG00000005772	1037	2.67445	6.38961	1.25649	Up	2.3719e-05	0.000116162
ENSRNOG00000005797	1631	2.63292	6.06601	1.20408	Up	5.61968e-07	3.55575e-06
ENSRNOG00000005809	1129	23.9312	49.685	1.05392	Up	6.92676e-27	1.86868e-25
ENSRNOG00000005810	3337	0.723867	1.87682	1.3745	Up	1.07075e-05	5.58229e-05
ENSRNOG00000005825	1390	122.354	254.149	1.05461	Up	3.31746e-160	5.62006e-158
ENSRNOG00000005871	1909	0.468646	1.6166	1.78639	Up	0.00020498	0.000837298
ENSRNOG00000005900	2128	0.924916	2.72985	1.56143	Up	3.1586e-06	1.78493e-05
ENSRNOG00000005918	415	11.21	26.6835	1.25116	Up	4.80748e-08	3.47599e-07
ENSRNOG00000005932	3265	2.13729	4.36463	1.03008	Up	1.15307e-07	8.02415e-07
ENSRNOG00000005964	5717	0.344275	3.46114	3.32961	Up	1.26103e-42	5.77545e-41
ENSRNOG00000005965	2323	1.42496	4.33715	1.60582	Up	3.33372e-10	3.06255e-09
ENSRNOG00000006060	2727	6.36455	12.7813	1.00591	Up	3.91468e-16	5.7803e-15
ENSRNOG00000006066	1622	0.772197	2.46225	1.67294	Up	5.18192e-05	0.000237605
ENSRNOG00000006104	8461	0.306639	0.0643665	-2.25216	Down	8.29732e-05	0.000366072
ENSRNOG00000006278	1233	1.30605	4.04884	1.63229	Up	8.35972e-06	4.4331e-05
ENSRNOG00000006319	1056	1.2708	5.07129	1.99661	Up	1.13961e-07	7.9515e-07
ENSRNOG00000006359	1323	4.39546	9.3306	1.08595	Up	2.61782e-07	1.7322e-06
ENSRNOG00000006388	2767	1.84296	4.00204	1.11871	Up	5.9196e-07	3.72755e-06
ENSRNOG00000006394	1933	5.27623	14.5566	1.46409	Up	7.9769e-23	1.76264e-21
ENSRNOG00000006396	3005	1.28019	3.02055	1.23845	Up	9.64894e-07	5.8559e-06
ENSRNOG00000006519	1038	0.172379	1.92378	3.48029	Up	1.66634e-05	8.40371e-05
ENSRNOG00000006548	4443	7.91348	18.8563	1.25266	Up	2.48368e-51	1.42812e-49
ENSRNOG00000006570	4032	3.10641	6.84358	1.1395	Up	1.09006e-15	1.57848e-14
ENSRNOG00000006620	4240	0.0844005	0.599408	2.82821	Up	9.09534e-06	4.79254e-05
ENSRNOG00000006623	1210	5.32351	10.6521	1.00068	Up	8.60594e-07	5.26141e-06
ENSRNOG00000006661	1927	0.371415	1.41309	1.92775	Up	0.000247716	0.00099307
ENSRNOG00000006715	1846	3.15016	6.98212	1.14824	Up	3.70988e-08	2.71604e-07
ENSRNOG00000006802	3052	0.703522	1.9926	1.50199	Up	3.55686e-06	1.99141e-05
ENSRNOG00000006813	2478	4.98229	10.9888	1.14115	Up	1.55531e-15	2.23985e-14
ENSRNOG00000006940	1253	1.1424	4.05665	1.82821	Up	1.12642e-06	6.7943e-06
ENSRNOG00000006963	1940	0.876199	3.04118	1.7953	Up	2.1485e-07	1.43857e-06
ENSRNOG00000007027	2486	2.41115	5.51323	1.19318	Up	4.82006e-09	3.89636e-08
ENSRNOG00000007047	2838	9.89848	21.2047	1.0991	Up	1.22023e-30	3.82202e-29
ENSRNOG00000007079	4189	0.106785	0.628374	2.55691	Up	1.86002e-05	9.29717e-05
ENSRNOG00000007081	3693	38.4216	88.3097	1.20066	Up	5.36718e-182	1.09818e-179
ENSRNOG00000007159	780	13.4197	28.2776	1.07531	Up	8.11532e-12	8.66239e-11
ENSRNOG00000007178	1388	2.38486	5.16616	1.11519	Up	6.3e-05	0.000284566
ENSRNOG00000007302	8942	46.0229	92.1277	1.00128	Up	0	0
ENSRNOG00000007310	1107	1.21226	4.50968	1.89533	Up	7.6916e-07	4.73919e-06
ENSRNOG00000007338	3666	20.426	53.7524	1.39592	Up	1.92804e-139	2.78681e-137
ENSRNOG00000007345	3578	1.12518	2.35925	1.06817	Up	2.72154e-05	0.000131891
ENSRNOG00000007370	1657	6.42504	14.2423	1.14841	Up	8.76656e-14	1.10405e-12
ENSRNOG00000007387	4001	11.0685	27.6318	1.31987	Up	1.04289e-72	8.42605e-71
ENSRNOG00000007390	1563	44.1885	150.176	1.76491	Up	1.4585e-232	3.64742e-230
ENSRNOG00000007393	2875	9.11761	20.2372	1.15028	Up	8.26594e-32	2.70186e-30
ENSRNOG00000007539	2465	12.0859	30.8205	1.35057	Up	2.82344e-52	1.66604e-50
ENSRNOG00000007540	761	0.940495	4.77096	2.34279	Up	1.54086e-06	9.1161e-06
ENSRNOG00000007607	2481	1.87511	27.1827	3.85764	Up	5.39004e-160	9.03405e-158
ENSRNOG00000007637	5156	3.55707	7.88671	1.14873	Up	1.14017e-22	2.49144e-21
ENSRNOG00000007722	797	1.90828	5.23878	1.45696	Up	0.000181065	0.000748735
ENSRNOG00000007744	2107	7.34569	15.2931	1.05791	Up	3.40524e-16	5.04225e-15
ENSRNOG00000007804	1404	10.514	21.0757	1.00327	Up	7.23284e-14	9.16761e-13
ENSRNOG00000007830	2891	7.64364	101.505	3.73115	Up	0	0
ENSRNOG00000007869	2770	2.68071	5.37396	1.00337	Up	1.14391e-07	7.97444e-07
ENSRNOG00000007909	1604	1.11552	5.09294	2.19078	Up	3.1227e-12	3.44043e-11
ENSRNOG00000007955	1701	13.9378	41.5151	1.57464	Up	7.67012e-61	5.30012e-59
ENSRNOG00000007989	2363	2.42308	5.4545	1.17061	Up	2.27526e-08	1.71106e-07
ENSRNOG00000007999	1282	15.911	43.2597	1.443	Up	1.59305e-42	7.25392e-41
ENSRNOG00000008015	1589	5.74285	234.83	5.35371	Up	0	0
ENSRNOG00000008154	1222	0.366058	1.93122	2.39937	Up	9.60966e-05	0.000419391
ENSRNOG00000008182	1558	37.2673	81.3296	1.12587	Up	4.91148e-65	3.63288e-63
ENSRNOG00000008196	3031	6.4346	13.1165	1.02746	Up	8.81932e-19	1.53534e-17
ENSRNOG00000008224	777	3.56937	13.3172	1.89955	Up	8.0307e-13	9.33754e-12
ENSRNOG00000008243	2563	3.10665	6.62252	1.09202	Up	1.27962e-09	1.09212e-08
ENSRNOG00000008245	786	15.0246	31.7571	1.07975	Up	2.90904e-13	3.49329e-12
ENSRNOG00000008301	1297	92.1547	194.132	1.07491	Up	2.5711e-118	3.16466e-116
ENSRNOG00000008373	837	3.84794	8.45862	1.13634	Up	5.43386e-05	0.000248218
ENSRNOG00000008405	1092	15.5662	7.7302	-1.00984	Down	1.25635e-08	9.68859e-08
ENSRNOG00000008645	2342	20.7808	48.0192	1.20836	Up	1.244e-64	9.0737e-63
ENSRNOG00000008697	1448	2.53318	6.39385	1.33573	Up	1.54433e-07	1.0574e-06
ENSRNOG00000008706	2232	3.48719	8.62129	1.30584	Up	9.3496e-14	1.1756e-12
ENSRNOG00000008749	5546	51.0235	103.419	1.01926	Up	7.56338e-245	1.98602e-242
ENSRNOG00000008759	2981	0.210081	1.1266	2.42296	Up	2.48448e-06	1.42858e-05
ENSRNOG00000008816	2306	2.40538	4.88082	1.02086	Up	2.96622e-06	1.68528e-05
ENSRNOG00000008826	3931	0	0.438714	8.77714	Up	1.64972e-06	9.72e-06
ENSRNOG00000008839	1830	3.56881	7.58876	1.08842	Up	4.41894e-08	3.21127e-07
ENSRNOG00000008936	4339	1.23712	4.68586	1.92132	Up	3.8019e-24	8.9535e-23
ENSRNOG00000009007	2293	0.468197	1.93965	2.05061	Up	9.17408e-07	5.59573e-06
ENSRNOG00000009204	2610	0.479887	0	-8.90655	Down	6.79994e-05	0.000304962
ENSRNOG00000009222	3804	3.41019	6.82427	1.00082	Up	2.66816e-12	2.95618e-11
ENSRNOG00000009243	1693	27.1089	55.5435	1.03485	Up	1.05926e-42	4.86549e-41
ENSRNOG00000009274	1545	4.86409	11.5736	1.25059	Up	3.85204e-12	4.20574e-11
ENSRNOG00000009280	1449	17.72	40.4664	1.19134	Up	8.59664e-34	3.07818e-32
ENSRNOG00000009285	1507	1.84035	4.93891	1.42422	Up	8.01802e-07	4.92299e-06
ENSRNOG00000009303	1792	1.14826	2.98844	1.37994	Up	4.526e-05	0.000210221
ENSRNOG00000009338	1177	8.05713	17.1972	1.09384	Up	3.14314e-11	3.19485e-10
ENSRNOG00000009354	2547	12.048	24.7321	1.03759	Up	2.81762e-29	8.34429e-28
ENSRNOG00000009427	2428	1.28965	2.69162	1.0615	Up	0.00024407	0.00097995
ENSRNOG00000009436	2515	2.41892	8.15645	1.75358	Up	1.13345e-21	2.32218e-20
ENSRNOG00000009565	1425	42.5663	134.654	1.66148	Up	4.59214e-175	8.613e-173
ENSRNOG00000009625	4365	45.05	91.5161	1.0225	Up	4.84846e-172	8.88227e-170
ENSRNOG00000009629	1503	15.7739	36.5365	1.2118	Up	1.41766e-32	4.79296e-31
ENSRNOG00000009768	536	16.0235	34.0378	1.08695	Up	3.60492e-10	3.29632e-09
ENSRNOG00000009787	915	2.54216	6.74557	1.40788	Up	8.57942e-06	4.53739e-05
ENSRNOG00000009805	957	14.3031	28.7383	1.00665	Up	4.68316e-13	5.53512e-12
ENSRNOG00000009867	2614	21.5619	44.5851	1.04808	Up	1.41841e-53	8.46482e-52
ENSRNOG00000009892	6064	3.71786	10.1485	1.44872	Up	2.85596e-47	1.45147e-45
ENSRNOG00000009907	1401	0.383146	1.94363	2.34279	Up	3.42994e-05	0.00016316
ENSRNOG00000009912	2498	1.7191	4.46934	1.37841	Up	3.49194e-09	2.8639e-08
ENSRNOG00000009951	3070	6.70256	13.7777	1.03956	Up	3.07652e-20	5.81182e-19
ENSRNOG00000010018	779	3.67505	9.78751	1.41318	Up	6.82912e-07	4.24597e-06
ENSRNOG00000010060	2902	0.493258	1.65771	1.74878	Up	4.41564e-06	2.44443e-05
ENSRNOG00000010104	1188	7.07885	14.3639	1.02086	Up	8.40414e-09	6.60715e-08
ENSRNOG00000010133	1575	19.0858	47.2567	1.30802	Up	7.23846e-49	3.87898e-47
ENSRNOG00000010208	740	5.56131	11.2846	1.02086	Up	5.79678e-05	0.00026327
ENSRNOG00000010233	2851	21.8405	48.1695	1.14111	Up	7.8455e-72	6.24272e-70
ENSRNOG00000010240	2474	3.90549	9.72247	1.31582	Up	5.2182e-17	8.09978e-16
ENSRNOG00000010253	4223	5.42338	11.5206	1.08695	Up	1.16221e-24	2.85657e-23
ENSRNOG00000010266	2566	0.697308	1.9809	1.50629	Up	2.2197e-05	0.000109286
ENSRNOG00000010278	1045	0	1.12917	10.141	Up	0.00011028	0.000477717
ENSRNOG00000010296	2063	0.910691	2.55187	1.48652	Up	1.90412e-05	9.49952e-05
ENSRNOG00000010311	3402	0.89412	1.94769	1.12322	Up	0.000110162	0.000477471
ENSRNOG00000010335	1578	2.2678	4.60165	1.02086	Up	0.000178813	0.00074098
ENSRNOG00000010423	2571	0	0.423652	8.72674	Up	0.000222166	0.000901655
ENSRNOG00000010645	948	28.0285	69.2246	1.30439	Up	4.12814e-43	1.91291e-41
ENSRNOG00000010661	891	1.40573	4.48235	1.67294	Up	5.18192e-05	0.000237813
ENSRNOG00000010718	2823	3.20082	7.49162	1.22683	Up	1.0093e-13	1.26504e-12
ENSRNOG00000010753	1359	2.56742	5.67715	1.14485	Up	2.2311e-05	0.000109812
ENSRNOG00000010799	2609	3.60053	9.42813	1.38876	Up	1.00674e-18	1.74875e-17
ENSRNOG00000010832	1467	5.24469	11.7558	1.16445	Up	1.16988e-10	1.12868e-09
ENSRNOG00000010833	2061	1.69293	6.7382	1.99285	Up	9.94442e-18	1.63033e-16
ENSRNOG00000010918	1389	1.03055	4.90105	2.24968	Up	1.03052e-10	1.00036e-09
ENSRNOG00000010941	2020	1.77158	4.3137	1.28389	Up	7.97902e-07	4.90287e-06
ENSRNOG00000010947	2385	25.2076	57.8477	1.1984	Up	7.12766e-78	6.13641e-76
ENSRNOG00000010974	3942	0.204257	1.01313	2.31037	Up	5.59218e-07	3.54261e-06
ENSRNOG00000010977	896	14.8775	32.7209	1.13708	Up	1.59056e-16	2.39572e-15
ENSRNOG00000010994	2096	0.12805	1.64559	3.68382	Up	4.3316e-09	3.52138e-08
ENSRNOG00000011026	2331	16.3116	32.6311	1.00035	Up	4.63084e-33	1.60349e-31
ENSRNOG00000011039	571	2.66357	11.9222	2.16222	Up	2.88416e-10	2.66823e-09
ENSRNOG00000011070	1159	3.16484	6.97007	1.13904	Up	1.54412e-05	7.835e-05
ENSRNOG00000011094	4010	1.00397	2.39934	1.25693	Up	3.33362e-07	2.1793e-06
ENSRNOG00000011101	1609	3.28055	7.16437	1.1269	Up	2.96256e-07	1.94642e-06
ENSRNOG00000011153	3663	3.12625	7.21085	1.20574	Up	2.32594e-16	3.47677e-15
ENSRNOG00000011181	1433	7.11721	14.6951	1.04595	Up	6.56866e-11	6.48835e-10
ENSRNOG00000011236	2630	0.102051	0.931834	3.19078	Up	3.8714e-06	2.16214e-05
ENSRNOG00000011253	2491	0.646472	1.89479	1.55137	Up	2.99116e-05	0.000143808
ENSRNOG00000011292	4555	124.131	263.893	1.08809	Up	0	0
ENSRNOG00000011296	2079	2.92621	1.00416	-1.54304	Down	2.33934e-06	1.35054e-05
ENSRNOG00000011305	3029	1.21098	2.72692	1.1711	Up	7.85542e-06	4.17833e-05
ENSRNOG00000011310	3402	1.42007	3.41512	1.26597	Up	1.66631e-08	1.27009e-07
ENSRNOG00000011360	3087	0.55064	1.8818	1.77293	Up	3.3793e-07	2.20733e-06
ENSRNOG00000011365	1455	1.72166	6.92453	2.00792	Up	2.2946e-13	2.78516e-12
ENSRNOG00000011411	3390	2.16404	5.70309	1.39802	Up	3.59406e-15	5.05124e-14
ENSRNOG00000011451	3955	0.271448	0.872103	1.68382	Up	0.000161813	0.000674434
ENSRNOG00000011459	3552	1.43566	3.34756	1.22139	Up	2.83536e-08	2.10217e-07
ENSRNOG00000011474	4333	6.7723	2.97461	-1.18695	Down	1.43599e-17	2.31094e-16
ENSRNOG00000011483	487	2.93929	35.5988	3.59829	Up	4.78638e-40	2.03809e-38
ENSRNOG00000011648	2624	217.218	457.089	1.07334	Up	0	0
ENSRNOG00000011649	2544	1.19567	4.49556	1.91068	Up	4.00354e-14	5.17015e-13
ENSRNOG00000011763	616	21.4947	49.9516	1.21655	Up	4.69332e-19	8.31758e-18
ENSRNOG00000011796	2703	64.9719	138.25	1.08939	Up	1.94068e-178	3.72871e-176
ENSRNOG00000011800	1768	6.37587	15.0937	1.24325	Up	2.96482e-17	4.67107e-16
ENSRNOG00000011815	2587	15.7004	69.4703	2.1456	Up	3.91416e-231	9.63556e-229
ENSRNOG00000011861	1807	1.73285	0.45208	-1.9385	Down	8.01636e-05	0.000355068
ENSRNOG00000011895	1836	0.682192	2.27413	1.73707	Up	2.12716e-05	0.00010519
ENSRNOG00000011944	1396	2.43528	5.00652	1.03972	Up	0.000190556	0.000784688
ENSRNOG00000011951	2770	28.6803	57.9012	1.01353	Up	3.11548e-69	2.39436e-67
ENSRNOG00000011971	2912	41.5371	86.8089	1.06344	Up	9.4215e-117	1.14181e-114
ENSRNOG00000012036	5626	1.44708	3.30738	1.19255	Up	8.97776e-12	9.53773e-11
ENSRNOG00000012223	12278	1.02012	0.310493	-1.71611	Down	2.14324e-13	2.60546e-12
ENSRNOG00000012270	2035	2.94552	6.60128	1.16422	Up	1.32867e-08	1.02163e-07
ENSRNOG00000012302	4560	8.63255	17.5364	1.0225	Up	6.9368e-36	2.65911e-34
ENSRNOG00000012331	2003	2.54592	5.89105	1.21034	Up	4.01022e-08	2.92776e-07
ENSRNOG00000012347	3411	3.77687	9.6063	1.34679	Up	2.19268e-23	4.9706e-22
ENSRNOG00000012424	2876	2.20862	4.95497	1.16573	Up	4.64184e-09	3.75808e-08
ENSRNOG00000012428	1110	8.14047	17.0087	1.06309	Up	3.73562e-10	3.41187e-09
ENSRNOG00000012438	2336	3.14045	8.78145	1.48349	Up	2.33912e-17	3.71875e-16
ENSRNOG00000012442	4086	0	0.444286	8.79534	Up	8.18894e-07	5.02011e-06
ENSRNOG00000012475	1658	1.18711	3.50369	1.56143	Up	3.1586e-06	1.78429e-05
ENSRNOG00000012502	2159	9.19923	19.6334	1.09372	Up	6.81086e-22	1.4175e-20
ENSRNOG00000012516	3852	199.832	440.241	1.13951	Up	0	0
ENSRNOG00000012557	872	5.74543	18.8405	1.71335	Up	3.88908e-17	6.09676e-16
ENSRNOG00000012566	5201	0.894474	2.35601	1.39724	Up	3.9979e-10	3.63876e-09
ENSRNOG00000012624	11679	3.33223	1.30567	-1.35169	Down	1.45815e-27	4.02331e-26
ENSRNOG00000012695	1033	3.9839	7.99598	1.00509	Up	7.8843e-05	0.000349612
ENSRNOG00000012701	3009	1.33795	2.80538	1.06817	Up	2.72154e-05	0.000131932
ENSRNOG00000012749	1075	24.4675	55.3049	1.17654	Up	1.34248e-33	4.73172e-32
ENSRNOG00000012807	1001	31.8176	77.5287	1.28491	Up	1.54526e-49	8.42407e-48
ENSRNOG00000012830	1599	2.12611	4.88181	1.1992	Up	9.59992e-06	5.04156e-05
ENSRNOG00000012863	1706	14.4738	36.4453	1.3323	Up	3.08244e-42	1.38359e-40
ENSRNOG00000012881	3686	15.6308	36.1002	1.20761	Up	4.5581e-76	3.88178e-74
ENSRNOG00000012886	1941	3.59518	10.9894	1.61197	Up	4.05784e-20	7.61994e-19
ENSRNOG00000012924	3296	1.08574	2.67125	1.29884	Up	5.54232e-07	3.51527e-06
ENSRNOG00000012962	1244	1.00684	3.21043	1.67294	Up	5.18192e-05	0.000237674
ENSRNOG00000013042	1161	0.539407	2.65814	2.30097	Up	1.22781e-05	6.3299e-05
ENSRNOG00000013090	1059	12.0807	32.0558	1.40788	Up	9.48206e-26	2.42123e-24
ENSRNOG00000013092	2262	0.474613	1.72547	1.86216	Up	1.64621e-05	8.3075e-05
ENSRNOG00000013102	1885	12.0077	24.4615	1.02655	Up	1.66214e-21	3.35731e-20
ENSRNOG00000013160	3558	23.2588	50.9706	1.13189	Up	4.57326e-93	4.70926e-91
ENSRNOG00000013179	1868	19.9236	46.5499	1.2243	Up	2.15912e-51	1.24604e-49
ENSRNOG00000013220	3891	5.15036	11.7571	1.19078	Up	1.05429e-26	2.82009e-25
ENSRNOG00000013240	1658	2.85984	7.77382	1.44269	Up	4.96176e-11	4.9539e-10
ENSRNOG00000013294	1562	0.687308	2.32439	1.75783	Up	6.5825e-05	0.000295968
ENSRNOG00000013306	5179	1.17467	4.38152	1.89918	Up	2.20898e-26	5.81981e-25
ENSRNOG00000013317	2546	1.51099	4.13552	1.45258	Up	2.4257e-09	2.01672e-08
ENSRNOG00000013383	1371	4.50259	9.07013	1.01037	Up	1.10586e-06	6.67798e-06
ENSRNOG00000013426	2069	2.50795	5.04508	1.00837	Up	8.43348e-06	4.4647e-05
ENSRNOG00000013484	1157	10.9028	26.9871	1.30757	Up	1.96681e-21	3.95748e-20
ENSRNOG00000013554	1385	0.581358	2.29376	1.98022	Up	5.37996e-05	0.000245899
ENSRNOG00000013578	1157	1.54649	4.86395	1.65313	Up	1.7667e-06	1.03859e-05
ENSRNOG00000013641	6921	0.271457	0.786888	1.53543	Up	8.3846e-06	4.4433e-05
ENSRNOG00000013683	2571	23.1404	78.5875	1.76389	Up	2.6225e-200	5.43651e-198
ENSRNOG00000013720	3792	16.3263	32.9128	1.01145	Up	4.28002e-54	2.59353e-52
ENSRNOG00000013764	2444	2.04992	4.23384	1.04639	Up	4.84768e-06	2.66766e-05
ENSRNOG00000013786	1937	50.9445	143.579	1.49484	Up	5.31404e-217	1.23122e-214
ENSRNOG00000013851	4756	4.00672	10.4203	1.37891	Up	9.37594e-36	3.58539e-34
ENSRNOG00000013862	1623	1.37807	4.08258	1.56683	Up	5.9137e-07	3.72681e-06
ENSRNOG00000013922	1666	4.88672	9.8613	1.01291	Up	1.9637e-08	1.4867e-07
ENSRNOG00000013938	4881	1.04476	3.01257	1.52782	Up	2.33114e-13	2.82516e-12
ENSRNOG00000014010	2792	1.53807	3.18597	1.05061	Up	2.13808e-05	0.000105663
ENSRNOG00000014125	1263	1.4167	4.67133	1.7213	Up	4.74506e-07	3.04267e-06
ENSRNOG00000014137	2787	26.1942	59.6323	1.18685	Up	4.97968e-92	5.02916e-90
ENSRNOG00000014166	2691	5.41907	11.9742	1.14381	Up	3.60796e-18	6.03433e-17
ENSRNOG00000014170	2679	7.48043	15.6531	1.06525	Up	7.84288e-21	1.52737e-19
ENSRNOG00000014171	1588	4.56337	11.6032	1.34635	Up	8.45594e-14	1.06579e-12
ENSRNOG00000014202	1368	1.50416	3.98103	1.40419	Up	3.06732e-05	0.000147244
ENSRNOG00000014205	1056	20.1634	80.9688	2.00563	Up	7.58836e-102	8.41934e-100
ENSRNOG00000014241	4469	38.3362	78.6422	1.03659	Up	5.21092e-155	8.46372e-153
ENSRNOG00000014288	8331	17.0424	36.2373	1.08835	Up	2.56192e-144	3.77225e-142
ENSRNOG00000014297	2488	4.2431	9.77721	1.20431	Up	3.69866e-15	5.18899e-14
ENSRNOG00000014305	2696	2.42245	6.09381	1.33088	Up	2.8907e-12	3.18928e-11
ENSRNOG00000014316	1974	10.6959	23.8184	1.15503	Up	3.53694e-26	9.24121e-25
ENSRNOG00000014320	1539	1.04637	3.36176	1.68382	Up	3.50226e-06	1.96363e-05
ENSRNOG00000014338	3172	5.13321	13.6781	1.41393	Up	1.15436e-32	3.91118e-31
ENSRNOG00000014350	1985	14.4676	161.552	3.48111	Up	0	0
ENSRNOG00000014361	1390	1.09417	3.91802	1.84029	Up	4.09146e-07	2.64293e-06
ENSRNOG00000014409	1479	18.9938	7.60999	-1.31956	Down	1.19606e-19	2.17597e-18
ENSRNOG00000014479	4791	7.80551	19.0402	1.28648	Up	4.99428e-58	3.26493e-56
ENSRNOG00000014532	2428	1.2528	2.87854	1.20018	Up	2.809e-05	0.000135712
ENSRNOG00000014541	4250	9.57797	19.5844	1.03191	Up	8.00088e-38	3.24046e-36
ENSRNOG00000014548	4370	15.211	31.9452	1.07048	Up	5.3373e-66	4.00425e-64
ENSRNOG00000014604	1555	4.02734	10.3901	1.36731	Up	1.55533e-12	1.75658e-11
ENSRNOG00000014653	1455	1.72166	5.1778	1.58854	Up	7.33894e-08	5.21538e-07
ENSRNOG00000014718	2772	7.29401	16.012	1.13437	Up	3.85816e-24	9.04543e-23
ENSRNOG00000014751	4602	1.26362	4.35889	1.78639	Up	9.70424e-22	2.00118e-20
ENSRNOG00000014833	1337	5.82155	12.6273	1.11708	Up	7.01698e-10	6.18995e-09
ENSRNOG00000014837	2943	5.80623	14.8658	1.35632	Up	5.2543e-31	1.66562e-29
ENSRNOG00000014851	5027	14.6112	30.6049	1.06669	Up	3.83662e-72	3.06832e-70
ENSRNOG00000014956	2111	0.211901	1.07494	2.34279	Up	0.000164509	0.000684947
ENSRNOG00000015024	1807	0	0.602773	9.23547	Up	0.000222166	0.000900959
ENSRNOG00000015036	2702	13.1449	33.4248	1.34642	Up	1.57612e-61	1.10856e-59
ENSRNOG00000015062	1845	0.242451	1.27911	2.39937	Up	9.60966e-05	0.000419275
ENSRNOG00000015076	4550	0.747177	2.21433	1.56735	Up	6.71072e-10	5.93307e-09
ENSRNOG00000015160	2093	1.66704	6.63518	1.99285	Up	9.94442e-18	1.62863e-16
ENSRNOG00000015222	2023	8.88897	30.9139	1.79817	Up	6.04714e-65	4.45199e-63
ENSRNOG00000015310	2053	1.65594	4.99597	1.59311	Up	2.92214e-10	2.70019e-09
ENSRNOG00000015357	2675	1.60535	4.51293	1.49118	Up	7.12592e-11	7.02559e-10
ENSRNOG00000015403	535	0.334447	3.05386	3.19078	Up	0.000195279	0.000801622
ENSRNOG00000015410	1525	32.2659	65.8883	1.03001	Up	3.57004e-45	1.72534e-43
ENSRNOG00000015442	2709	6.96826	14.7091	1.07784	Up	3.16872e-20	5.97882e-19
ENSRNOG00000015578	2073	0	0.525427	9.03735	Up	0.000222166	0.000900264
ENSRNOG00000015582	2899	3.70326	8.35976	1.17467	Up	1.40269e-14	1.88723e-13
ENSRNOG00000015599	1778	3.47191	7.65755	1.14115	Up	1.80316e-08	1.37042e-07
ENSRNOG00000015615	1815	1.23229	3.40066	1.46447	Up	4.56712e-06	2.52208e-05
ENSRNOG00000015636	1701	2.209	4.48235	1.02086	Up	0.000122725	0.000526705
ENSRNOG00000015682	2317	1.62171	4.15251	1.35646	Up	6.18118e-08	4.42255e-07
ENSRNOG00000015787	1834	2.73174	5.49356	1.00792	Up	1.22212e-05	6.30262e-05
ENSRNOG00000015850	613	11.5297	27.2451	1.24064	Up	2.61786e-11	2.67647e-10
ENSRNOG00000015903	3251	0.770535	4.7743	2.63136	Up	6.29402e-27	1.70382e-25
ENSRNOG00000015941	2556	8.47043	19.2473	1.18415	Up	2.34166e-28	6.6714e-27
ENSRNOG00000015948	2588	1.48647	2.98116	1.00399	Up	0.000138444	0.00058508
ENSRNOG00000015957	3456	16.6452	34.6944	1.0596	Up	4.98732e-56	3.15563e-54
ENSRNOG00000016012	1398	7.48738	16.1018	1.10469	Up	1.67147e-12	1.88234e-11
ENSRNOG00000016037	972	4.32596	11.7662	1.44355	Up	5.97402e-10	5.31155e-09
ENSRNOG00000016042	2244	0.47842	2.10335	2.13634	Up	2.0601e-07	1.38232e-06
ENSRNOG00000016069	1027	0.435563	2.47467	2.50629	Up	3.23032e-05	0.000154598
ENSRNOG00000016070	3296	1.52003	3.11187	1.03368	Up	6.61562e-06	3.55731e-05
ENSRNOG00000016099	1626	2.80608	6.4196	1.19392	Up	3.28448e-07	2.15075e-06
ENSRNOG00000016112	879	4.37654	8.77729	1.00399	Up	0.000138444	0.000585237
ENSRNOG00000016217	1908	1.17223	3.37762	1.52675	Up	1.35315e-06	8.0692e-06
ENSRNOG00000016225	2945	1.48854	3.45194	1.2135	Up	3.32372e-07	2.17463e-06
ENSRNOG00000016254	4189	2.52013	5.11366	1.02086	Up	1.07222e-10	1.03956e-09
ENSRNOG00000016299	2366	19.6247	69.3225	1.82065	Up	3.32308e-170	5.8826e-168
ENSRNOG00000016308	1814	1.77548	4.85361	1.45085	Up	5.1221e-08	3.6933e-07
ENSRNOG00000016322	409	9.40581	25.0776	1.41477	Up	7.80892e-09	6.15763e-08
ENSRNOG00000016362	1479	2.72205	6.56668	1.27047	Up	2.33036e-07	1.55374e-06
ENSRNOG00000016408	2370	3.69938	10.264	1.47224	Up	4.30256e-20	8.06986e-19
ENSRNOG00000016541	2612	9.89865	32.2829	1.70547	Up	7.18292e-81	6.50385e-79
ENSRNOG00000016571	861	2.80551	8.11742	1.53276	Up	4.44528e-07	2.86209e-06
ENSRNOG00000016575	5296	4.27389	9.75203	1.19015	Up	6.47724e-30	1.96248e-28
ENSRNOG00000016636	3159	1.61427	3.30429	1.03346	Up	5.49736e-06	2.99795e-05
ENSRNOG00000016678	2127	22.629	46.0879	1.02621	Up	7.396e-44	3.49922e-42
ENSRNOG00000016687	4495	2.44809	4.9069	1.00316	Up	1.06164e-10	1.02994e-09
ENSRNOG00000016752	4046	20.4314	46.8868	1.1984	Up	2.2528e-106	2.60977e-104
ENSRNOG00000016811	1017	0.96766	58.1019	5.90794	Up	1.27233e-178	2.47476e-176
ENSRNOG00000016818	3193	2.52171	6.3108	1.32342	Up	1.32505e-14	1.78581e-13
ENSRNOG00000016879	873	9.01819	22.0421	1.28935	Up	1.62269e-13	1.99887e-12
ENSRNOG00000016885	1781	33.1536	88.627	1.41858	Up	8.4524e-115	9.93788e-113
ENSRNOG00000016890	977	29.3942	72.9299	1.31098	Up	5.17412e-47	2.62117e-45
ENSRNOG00000016950	1368	8.82874	30.1231	1.77059	Up	1.71949e-42	7.80707e-41
ENSRNOG00000017056	309	84.8321	172.723	1.02578	Up	1.29238e-24	3.16664e-23
ENSRNOG00000017065	2190	2.04257	5.63671	1.46447	Up	7.85116e-11	7.70206e-10
ENSRNOG00000017079	4112	1.65353	4.19403	1.34279	Up	5.82926e-13	6.83842e-12
ENSRNOG00000017093	1941	12.4909	26.6083	1.091	Up	3.14372e-26	8.24115e-25
ENSRNOG00000017130	1491	2.82014	7.42699	1.39701	Up	2.8053e-09	2.32252e-08
ENSRNOG00000017209	1704	0.420022	1.91762	2.19078	Up	1.24082e-05	6.39485e-05
ENSRNOG00000017212	1394	2.88802	6.12062	1.0836	Up	1.97451e-05	9.82269e-05
ENSRNOG00000017260	2347	4.6886	13.0331	1.47495	Up	6.21828e-25	1.55014e-23
ENSRNOG00000017412	534	1.34029	6.11916	2.19078	Up	1.24082e-05	6.39276e-05
ENSRNOG00000017414	1956	22.5034	49.0033	1.12274	Up	2.05498e-49	1.11258e-47
ENSRNOG00000017469	1384	54.6225	114.378	1.06624	Up	3.99686e-74	3.27972e-72
ENSRNOG00000017484	3103	2.22004	5.41154	1.28545	Up	6.29574e-12	6.78914e-11
ENSRNOG00000017496	2301	9.05921	18.6979	1.04542	Up	9.80722e-21	1.89819e-19
ENSRNOG00000017558	1603	17.3571	39.2967	1.17888	Up	1.31539e-35	5.0179e-34
ENSRNOG00000017598	2184	2.58071	6.19247	1.26275	Up	1.20538e-09	1.03379e-08
ENSRNOG00000017602	1527	3.22237	7.96519	1.30559	Up	3.31656e-09	2.72716e-08
ENSRNOG00000017686	1359	1.18496	4.0074	1.75783	Up	9.23486e-07	5.62627e-06
ENSRNOG00000017693	2156	0.0829913	0.757799	3.19078	Up	0.000195279	0.000801414
ENSRNOG00000017718	1842	2.13705	4.58273	1.10059	Up	1.71843e-05	8.64703e-05
ENSRNOG00000017828	2484	0.216098	3.3983	3.97506	Up	1.05799e-21	2.17891e-20
ENSRNOG00000017874	1687	9.28056	19.9075	1.10103	Up	7.68922e-18	1.27386e-16
ENSRNOG00000017897	2472	0.0723823	0.771083	3.41318	Up	3.09936e-05	0.000148692
ENSRNOG00000018003	2978	0.901255	3.80992	2.07975	Up	1.67987e-15	2.40822e-14
ENSRNOG00000018027	2898	1.97575	4.69811	1.24968	Up	1.44362e-09	1.22281e-08
ENSRNOG00000018101	1496	0.777433	2.66963	1.77985	Up	2.37374e-05	0.000116216
ENSRNOG00000018163	1528	0.2342	1.48507	2.66472	Up	5.05764e-05	0.000232923
ENSRNOG00000018198	5878	6.65125	13.6043	1.03237	Up	1.98029e-36	7.72263e-35
ENSRNOG00000018275	2980	5.13371	48.7038	3.24596	Up	2.42912e-295	8.31974e-293
ENSRNOG00000018282	1553	32.145	85.5073	1.41145	Up	3.69822e-96	3.99078e-94
ENSRNOG00000018297	4150	0.388039	1.04984	1.4359	Up	0.000153902	0.000644874
ENSRNOG00000018316	1134	1.1045	5.04264	2.19078	Up	5.94444e-09	4.75887e-08
ENSRNOG00000018336	3055	0.292846	1.01018	1.78639	Up	0.00020498	0.000837081
ENSRNOG00000018338	1292	7.40922	15.1748	1.03428	Up	4.306e-10	3.89891e-09
ENSRNOG00000018413	3504	7.25112	2.87534	-1.33447	Down	3.3503e-18	5.62729e-17
ENSRNOG00000018414	3698	19.4267	44.132	1.18378	Up	4.85262e-90	4.77831e-88
ENSRNOG00000018459	2607	2.02471	4.90918	1.27777	Up	2.4028e-09	1.99874e-08
ENSRNOG00000018484	2389	0.898765	4.90122	2.44712	Up	3.80076e-19	6.78154e-18
ENSRNOG00000018690	2453	2.553	7.03051	1.46143	Up	1.56568e-14	2.09755e-13
ENSRNOG00000018714	2667	6.50773	13.2731	1.02828	Up	6.55796e-17	1.01097e-15
ENSRNOG00000018785	1903	1.08128	3.1957	1.56339	Up	1.80539e-06	1.05779e-05
ENSRNOG00000018797	2422	8.16337	19.6376	1.26638	Up	2.36702e-30	7.31224e-29
ENSRNOG00000018824	3458	1.08661	2.6511	1.28675	Up	3.9234e-07	2.53957e-06
ENSRNOG00000018915	2296	1.59758	5.49507	1.78225	Up	3.57598e-14	4.637e-13
ENSRNOG00000018952	2337	3.33052	8.66117	1.37882	Up	1.62032e-15	2.32922e-14
ENSRNOG00000018962	1398	1.40788	3.83068	1.44407	Up	2.4322e-05	0.00011882
ENSRNOG00000018991	2356	634.34	1359.2	1.09943	Up	0	0
ENSRNOG00000019018	2503	33.9558	72.2369	1.08908	Up	2.67558e-87	2.57035e-85
ENSRNOG00000019057	2336	2.37449	6.41123	1.43299	Up	1.76931e-12	1.99111e-11
ENSRNOG00000019129	7895	0.407945	1.20717	1.56518	Up	2.02048e-09	1.69323e-08
ENSRNOG00000019141	897	0.199475	1.82142	3.19078	Up	0.000195279	0.000801831
ENSRNOG00000019142	2496	2.6524	5.38205	1.02086	Up	3.25676e-07	2.13348e-06
ENSRNOG00000019147	1764	8.1147	19.9647	1.29884	Up	9.60896e-24	2.22304e-22
ENSRNOG00000019183	2188	11.5715	156.976	3.7619	Up	0	0
ENSRNOG00000019195	3179	1.43526	2.91233	1.02086	Up	2.27992e-05	0.00011204
ENSRNOG00000019211	1758	5.44523	12.5464	1.20421	Up	7.03216e-14	8.94925e-13
ENSRNOG00000019244	2267	22.1787	45.0434	1.02214	Up	2.50972e-45	1.22417e-43
ENSRNOG00000019270	2465	1.37917	3.53496	1.35789	Up	2.5526e-07	1.69047e-06
ENSRNOG00000019340	6132	1.29849	2.85684	1.13758	Up	1.84408e-10	1.74286e-09
ENSRNOG00000019342	1223	11.3385	32.8782	1.5359	Up	3.6412e-34	1.32182e-32
ENSRNOG00000019349	1607	3.78568	8.02053	1.08314	Up	1.51272e-07	1.03712e-06
ENSRNOG00000019370	1695	2.74464	8.51448	1.6333	Up	2.51426e-14	3.29278e-13
ENSRNOG00000019416	2451	0.620521	1.70351	1.45696	Up	0.000181065	0.000748538
ENSRNOG00000019422	3114	2.7006	39.0586	3.85429	Up	5.9933e-287	1.92703e-284
ENSRNOG00000019430	1599	13.9876	29.4611	1.07467	Up	1.60601e-23	3.66174e-22
ENSRNOG00000019465	3069	19.3563	38.7736	1.00227	Up	6.49256e-51	3.70617e-49
ENSRNOG00000019472	1346	1.39581	4.38328	1.65091	Up	1.01002e-06	6.11329e-06
ENSRNOG00000019500	2616	0.068398	0.763336	3.48029	Up	1.66634e-05	8.40102e-05
ENSRNOG00000019549	6228	12.6411	32.2233	1.34998	Up	5.33662e-135	7.44057e-133
ENSRNOG00000019573	1362	0.788234	2.73236	1.79345	Up	4.1668e-05	0.000195265
ENSRNOG00000019622	1936	28.5584	66.716	1.22412	Up	1.8792e-75	1.58325e-73
ENSRNOG00000019673	1811	6.12568	31.4253	2.35899	Up	1.71796e-83	1.59215e-81
ENSRNOG00000019689	8572	34.3581	72.1312	1.06997	Up	1.81576e-285	5.60929e-283
ENSRNOG00000019719	1809	4.00588	14.6513	1.87083	Up	5.70558e-30	1.73536e-28
ENSRNOG00000019728	3456	2.43335	5.56792	1.19419	Up	3.76974e-12	4.11874e-11
ENSRNOG00000019822	1276	8.06303	16.8589	1.06411	Up	2.17212e-11	2.23525e-10
ENSRNOG00000019854	1366	0.785926	2.52501	1.68382	Up	0.000161813	0.000674613
ENSRNOG00000020004	2865	2.43568	5.41754	1.15331	Up	1.32507e-09	1.12846e-08
ENSRNOG00000020072	2484	0.144065	0.950063	2.7213	Up	2.86664e-05	0.000138243
ENSRNOG00000020078	2136	2.42928	5.14179	1.08174	Up	1.29976e-06	7.76846e-06
ENSRNOG00000020087	2073	0.474728	1.70764	1.84683	Up	4.59692e-05	0.000213264
ENSRNOG00000020164	850	1.15778	4.80534	2.05328	Up	2.5573e-06	1.46884e-05
ENSRNOG00000020165	557	13.0101	56.8723	2.12809	Up	9.1023e-42	4.017e-40
ENSRNOG00000020169	3108	6.76454	13.9597	1.04521	Up	6.85454e-21	1.34153e-19
ENSRNOG00000020197	2565	4.29011	9.20061	1.10071	Up	5.69076e-13	6.68092e-12
ENSRNOG00000020355	1183	0	0.997445	9.96209	Up	0.00011028	0.000477848
ENSRNOG00000020431	1645	0.217543	1.65533	2.92775	Up	2.84296e-06	1.62109e-05
ENSRNOG00000020445	1671	6.10351	2.22709	-1.45448	Down	4.38976e-09	3.56682e-08
ENSRNOG00000020470	3433	4.24781	8.72511	1.03845	Up	9.46336e-15	1.29311e-13
ENSRNOG00000020525	6052	15.0044	35.2752	1.23327	Up	6.42842e-125	8.30162e-123
ENSRNOG00000020560	4665	0.805469	1.84843	1.1984	Up	3.29614e-06	1.85533e-05
ENSRNOG00000020679	2624	4.26184	10.3774	1.28389	Up	2.10864e-18	3.61105e-17
ENSRNOG00000020707	2041	7.4079	14.9871	1.01659	Up	1.44449e-14	1.94015e-13
ENSRNOG00000020716	2667	38.4091	84.4373	1.13643	Up	7.79208e-116	9.30032e-114
ENSRNOG00000020770	1382	4.53149	11.2967	1.31784	Up	1.43033e-11	1.49336e-10
ENSRNOG00000020797	1479	16.7557	38.9091	1.21546	Up	3.27228e-34	1.19064e-32
ENSRNOG00000020833	1992	1.03297	2.96179	1.51967	Up	4.13158e-06	2.29686e-05
ENSRNOG00000020837	722	6.0717	14.5831	1.26413	Up	8.1152e-08	5.74629e-07
ENSRNOG00000020850	1855	0.0964578	1.02756	3.41318	Up	3.09936e-05	0.000148647
ENSRNOG00000020867	2712	1.78137	4.48483	1.33206	Up	1.88451e-09	1.58519e-08
ENSRNOG00000020871	5250	64.7724	133.506	1.04346	Up	0	0
ENSRNOG00000020882	2300	1.12803	3.39392	1.58914	Up	4.21416e-08	3.07238e-07
ENSRNOG00000020936	871	1.95158	0.208421	-3.22707	Down	0.00013806	0.000583771
ENSRNOG00000020938	2007	21.04	52.145	1.30939	Up	4.20724e-68	3.18678e-66
ENSRNOG00000020942	2538	5.5695	11.1939	1.0071	Up	1.90044e-13	2.32284e-12
ENSRNOG00000020951	4490	6.13699	20.7613	1.75829	Up	4.88666e-93	4.99931e-91
ENSRNOG00000020980	654	3.5567	9.29881	1.38651	Up	1.26502e-05	6.50892e-05
ENSRNOG00000021007	1533	2.68452	6.63142	1.30465	Up	6.61024e-08	4.71882e-07
ENSRNOG00000021027	1622	30.226	9.96093	-1.60144	Down	1.12954e-43	5.2964e-42
ENSRNOG00000021087	2536	1.65806	3.47179	1.06618	Up	1.8762e-05	9.36913e-05
ENSRNOG00000021105	1242	5.61855	11.2546	1.00224	Up	2.85924e-07	1.88011e-06
ENSRNOG00000021137	2355	0.721795	3.0834	2.09486	Up	1.71483e-10	1.62656e-09
ENSRNOG00000021243	6671	1.79707	3.64648	1.02086	Up	5.9206e-12	6.40213e-11
ENSRNOG00000021248	2798	7.70585	16.0579	1.05926	Up	5.0966e-22	1.06636e-20
ENSRNOG00000021334	1790	0	0.608497	9.24911	Up	0.000222166	0.000900495
ENSRNOG00000021403	591	61.0055	228.071	1.90247	Up	9.18266e-149	1.39108e-146
ENSRNOG00000021413	390	6.65249	16.2916	1.29216	Up	2.3469e-05	0.000114973
ENSRNOG00000021536	2874	1.55645	4.76893	1.61541	Up	1.74357e-13	2.1394e-12
ENSRNOG00000021569	4770	0.468892	1.44619	1.62493	Up	1.66854e-07	1.13358e-06
ENSRNOG00000021671	732	1.95551	5.57997	1.51271	Up	0.000140782	0.000594643
ENSRNOG00000021687	735	7.30323	16.6716	1.19078	Up	3.31514e-08	2.43838e-07
ENSRNOG00000021750	912	26.3881	74.5448	1.49822	Up	1.26127e-54	7.73203e-53
ENSRNOG00000021919	1830	20.924	45.2846	1.11386	Up	1.97077e-42	8.92226e-41
ENSRNOG00000021966	2223	0.442695	1.55158	1.80936	Up	7.32264e-05	0.000326822
ENSRNOG00000022071	3288	1.19721	3.45071	1.52721	Up	1.27544e-10	1.22453e-09
ENSRNOG00000022237	1662	0.0538295	0.819202	3.92775	Up	0.000246126	0.000987198
ENSRNOG00000022239	3399	1.34236	2.75053	1.03493	Up	1.67317e-05	8.43277e-05
ENSRNOG00000022523	3475	5.58671	12.5116	1.16319	Up	1.38764e-24	3.38951e-23
ENSRNOG00000022552	3079	9.90822	22.4929	1.18277	Up	3.54602e-39	1.47798e-37
ENSRNOG00000022635	2831	0.695239	1.92372	1.46832	Up	1.62957e-05	8.22616e-05
ENSRNOG00000022712	1288	1.94488	4.43972	1.19078	Up	0.000169456	0.000704427
ENSRNOG00000022764	1352	4.36735	9.93609	1.18592	Up	8.0926e-09	6.37495e-08
ENSRNOG00000022839	2036	4.0426	15.336	1.92356	Up	2.67374e-36	1.03756e-34
ENSRNOG00000023030	1809	1.4342	3.56246	1.31263	Up	1.62092e-05	8.1904e-05
ENSRNOG00000023109	1481	7.49062	16.7929	1.1647	Up	9.64874e-15	1.3173e-13
ENSRNOG00000023122	972	12.7018	29.0419	1.19311	Up	4.04986e-17	6.32992e-16
ENSRNOG00000023226	599	93.9453	190.627	1.02086	Up	2.2273e-50	1.25325e-48
ENSRNOG00000023428	2619	0.649037	2.25273	1.7953	Up	2.1485e-07	1.43918e-06
ENSRNOG00000023446	4500	1.09346	2.21876	1.02086	Up	1.08394e-05	5.64545e-05
ENSRNOG00000023465	1128	47.5875	99.9408	1.07049	Up	1.21455e-53	7.27574e-52
ENSRNOG00000023509	3981	6.29241	22.481	1.83702	Up	7.21036e-95	7.62411e-93
ENSRNOG00000023809	1712	3.86704	8.74804	1.17773	Up	1.38739e-09	1.17898e-08
ENSRNOG00000023881	1522	1.41074	3.93604	1.48029	Up	5.33384e-06	2.91483e-05
ENSRNOG00000023896	2754	12.6368	43.3733	1.77918	Up	1.23964e-120	1.56244e-118
ENSRNOG00000024115	3010	0.564727	2.11087	1.90222	Up	2.13188e-08	1.60938e-07
ENSRNOG00000024264	2333	0.690254	2.17873	1.65829	Up	5.4214e-06	2.95858e-05
ENSRNOG00000024322	6987	0.627417	2.03957	1.70077	Up	6.46368e-15	8.95649e-14
ENSRNOG00000024399	966	0	3.00679	11.554	Up	1.83255e-10	1.73404e-09
ENSRNOG00000024525	2242	1.35673	3.64366	1.42525	Up	2.27518e-07	1.51952e-06
ENSRNOG00000024536	1014	1.23521	3.93863	1.67294	Up	5.18192e-05	0.000237882
ENSRNOG00000024594	3844	0.768036	2.0307	1.40273	Up	5.80986e-07	3.66284e-06
ENSRNOG00000024620	2364	7.07694	14.5904	1.04382	Up	6.88926e-17	1.061e-15
ENSRNOG00000024711	8355	0.792385	1.69476	1.09681	Up	2.67618e-08	1.99259e-07
ENSRNOG00000025053	14369	36.9339	74.5521	1.0133	Up	0	0
ENSRNOG00000025067	1949	1.79021	4.19142	1.22731	Up	3.98252e-06	2.21948e-05
ENSRNOG00000025094	1536	1.63086	4.19563	1.36325	Up	9.0536e-06	4.77215e-05
ENSRNOG00000025114	1396	12.9454	54.0314	2.06135	Up	2.8218e-93	2.92483e-91
ENSRNOG00000025297	1718	1.4581	3.59266	1.30097	Up	2.79654e-05	0.000135276
ENSRNOG00000025371	2489	13.0836	30.5962	1.22559	Up	2.69506e-45	1.31051e-43
ENSRNOG00000025384	3394	0.263596	0.962767	1.86886	Up	8.0552e-05	0.000356588
ENSRNOG00000025411	3274	10.5477	23.4543	1.15292	Up	1.3606e-41	5.98776e-40
ENSRNOG00000025418	3963	1.24162	2.56522	1.04685	Up	5.833e-06	3.15912e-05
ENSRNOG00000025448	1104	9.80545	19.9787	1.02681	Up	4.60552e-11	4.61284e-10
ENSRNOG00000025476	966	6.85339	22.8328	1.73622	Up	6.8727e-23	1.52506e-21
ENSRNOG00000025510	623	653.824	1872.9	1.5183	Up	0	0
ENSRNOG00000025534	1864	0.383968	1.46085	1.92775	Up	0.000247716	0.000992565
ENSRNOG00000025970	2031	7.09197	19.9769	1.49407	Up	3.7879e-33	1.3145e-31
ENSRNOG00000025980	546	0	3.6573	11.8366	Up	2.01774e-07	1.35563e-06
ENSRNOG00000025998	5322	0.638793	2.01251	1.65558	Up	3.5265e-11	3.57069e-10
ENSRNOG00000026060	1722	0.987124	3.10992	1.65558	Up	3.0932e-06	1.75174e-05
ENSRNOG00000026124	938	43.7785	93.9608	1.10184	Up	2.89308e-44	1.37705e-42
ENSRNOG00000026293	1005	49.4948	211.52	2.09544	Up	6.04148e-265	1.61328e-262
ENSRNOG00000026415	5670	24.9775	49.9622	1.00021	Up	2.85252e-118	3.48383e-116
ENSRNOG00000026430	1458	0	1.30735	10.3524	Up	4.06488e-07	2.62683e-06
ENSRNOG00000026522	4023	0.711625	0	-9.47497	Down	2.95308e-10	2.72718e-09
ENSRNOG00000026569	1725	2.80063	6.73521	1.26597	Up	1.66631e-08	1.2707e-07
ENSRNOG00000026902	3083	9.08285	23.082	1.34555	Up	8.32788e-49	4.44765e-47
ENSRNOG00000027096	1245	2.8025	8.01962	1.51682	Up	1.98883e-09	1.66848e-08
ENSRNOG00000027115	1057	7.95617	2.91967	-1.44627	Down	1.14574e-07	7.98371e-07
ENSRNOG00000027175	1449	2.90189	7.01585	1.27363	Up	1.14901e-07	8.00291e-07
ENSRNOG00000027257	3909	0.961246	2.39167	1.31504	Up	1.88801e-07	1.27281e-06
ENSRNOG00000027312	1674	1.33609	4.28353	1.68078	Up	4.58298e-08	3.31824e-07
ENSRNOG00000027357	2326	8.03873	21.6188	1.42724	Up	4.16226e-38	1.69448e-36
ENSRNOG00000027498	3977	1.32723	2.85289	1.104	Up	5.68778e-07	3.59306e-06
ENSRNOG00000027540	963	11.5198	24.9776	1.11651	Up	1.82278e-13	2.23312e-12
ENSRNOG00000027592	540	4.14188	9.74911	1.23498	Up	0.000206042	0.000840982
ENSRNOG00000027672	1602	0.335073	1.64311	2.29388	Up	5.82782e-05	0.000264375
ENSRNOG00000027742	2901	5.39686	10.8258	1.00428	Up	1.1942e-14	1.61223e-13
ENSRNOG00000027767	1851	0.193332	1.17689	2.60582	Up	8.88304e-05	0.000389622
ENSRNOG00000027808	1146	2.65427	7.36595	1.47256	Up	6.96918e-08	4.96381e-07
ENSRNOG00000027863	1128	0.0793126	1.20702	3.92775	Up	0.000246126	0.00098745
ENSRNOG00000028016	1584	1.35552	3.26626	1.26879	Up	0.000171709	0.000713228
ENSRNOG00000028072	1713	0.887856	2.43742	1.45696	Up	0.000181065	0.000748342
ENSRNOG00000028426	4540	13.4394	32.1885	1.26008	Up	5.31572e-89	5.1697e-87
ENSRNOG00000028436	1005	0.712156	2.70948	1.92775	Up	0.000247716	0.000992817
ENSRNOG00000028526	1782	1.75716	3.97299	1.17698	Up	3.3098e-05	0.000158018
ENSRNOG00000028670	2708	0.132149	0.871476	2.7213	Up	2.86664e-05	0.000138285
ENSRNOG00000028685	1110	2.33736	5.88762	1.3328	Up	1.11541e-05	5.79593e-05
ENSRNOG00000028688	1187	2.18574	4.97042	1.18525	Up	0.000140915	0.000595046
ENSRNOG00000028768	2158	2.3216	5.55205	1.2579	Up	1.17733e-08	9.13286e-08
ENSRNOG00000028891	1622	1.04798	2.74205	1.38764	Up	0.000193502	0.000795777
ENSRNOG00000028946	2830	7.61872	19.3723	1.34638	Up	5.03514e-38	2.04455e-36
ENSRNOG00000029205	1683	1.43526	3.61344	1.33206	Up	2.29024e-05	0.000112512
ENSRNOG00000029212	8437	10.1585	21.0324	1.04993	Up	7.4522e-81	6.70911e-79
ENSRNOG00000029242	1485	5.96431	12.408	1.05684	Up	7.32364e-10	6.44243e-09
ENSRNOG00000029394	2275	2.67411	5.98467	1.16222	Up	1.1105e-08	8.64847e-08
ENSRNOG00000029401	1221	2.34469	8.10292	1.78904	Up	1.82126e-11	1.88901e-10
ENSRNOG00000029841	2325	1.53918	3.6307	1.23809	Up	2.3404e-06	1.35066e-05
ENSRNOG00000029867	1452	4.99079	10.8146	1.11564	Up	2.86394e-09	2.36982e-08
ENSRNOG00000029886	556	2917.74	8237.97	1.49744	Up	0	0
ENSRNOG00000029903	3141	0.484208	1.53158	1.66132	Up	9.5129e-06	5.00253e-05
ENSRNOG00000029980	2331	15.5057	41.5093	1.42064	Up	3.06036e-71	2.4108e-69
ENSRNOG00000030021	1371	14.8129	32.3082	1.12505	Up	8.49436e-24	1.96807e-22
ENSRNOG00000030149	5505	1.88518	3.84175	1.02706	Up	1.13961e-10	1.10151e-09
ENSRNOG00000030183	3672	11.0856	22.9638	1.05067	Up	2.1554e-39	9.10411e-38
ENSRNOG00000030281	840	1.38457	0	-10.4352	Down	0.000135023	0.000572158
ENSRNOG00000030689	1353	7.27354	17.3082	1.25073	Up	1.87127e-15	2.67046e-14
ENSRNOG00000030715	4250	18.2929	36.9904	1.01587	Up	3.77516e-68	2.87332e-66
ENSRNOG00000030719	12332	0.246659	0.544664	1.14285	Up	7.87242e-05	0.000349183
ENSRNOG00000030888	2443	12.8905	25.8221	1.0023	Up	8.76854e-28	2.43219e-26
ENSRNOG00000031036	3401	8.3125	18.4951	1.15379	Up	2.05002e-34	7.4764e-33
ENSRNOG00000031041	934	8.81236	20.894	1.24549	Up	4.80192e-13	5.66274e-12
ENSRNOG00000031154	512	124.936	289.322	1.21149	Up	6.83492e-85	6.40977e-83
ENSRNOG00000031163	3452	2.15109	10.0707	2.22702	Up	2.88854e-48	1.51696e-46
ENSRNOG00000031230	611	478.365	1703.04	1.83193	Up	0	0
ENSRNOG00000031443	2763	0	0.394213	8.62283	Up	0.000222166	0.000901423
ENSRNOG00000031515	1473	2.0043	4.37508	1.12621	Up	0.000132758	0.000563926
ENSRNOG00000031598	3936	1.81839	3.96647	1.1252	Up	2.47944e-09	2.05923e-08
ENSRNOG00000031665	2427	0.700382	2.09435	1.58029	Up	1.11788e-05	5.80686e-05
ENSRNOG00000031686	556	2430.83	6926.41	1.51066	Up	0	0
ENSRNOG00000031687	939	0	1.15997	10.1799	Up	0.000222166	0.000900727
ENSRNOG00000032396	1245	2.15577	5.61374	1.38076	Up	3.01654e-06	1.71078e-05
ENSRNOG00000032417	1303	0	0.835925	9.70723	Up	0.000222166	0.000901191
ENSRNOG00000032596	1059	1.85857	6.4283	1.79025	Up	2.61616e-08	1.94974e-07
ENSRNOG00000032708	1500	9.0061	24.4467	1.44067	Up	1.31318e-28	3.78228e-27
ENSRNOG00000033017	1001	3.75376	8.07024	1.10428	Up	2.48918e-05	0.00012149
ENSRNOG00000033189	1169	1.68368	4.65873	1.46832	Up	1.62957e-05	8.2288e-05
ENSRNOG00000033217	1805	23.4937	52.1473	1.15032	Up	2.03864e-50	1.15121e-48
ENSRNOG00000033220	1454	2.15355	4.99409	1.2135	Up	1.65122e-05	8.33014e-05
ENSRNOG00000033256	1301	0.275064	1.81396	2.7213	Up	2.86664e-05	0.000138327
ENSRNOG00000033261	2716	2.47049	5.07977	1.03997	Up	1.4696e-07	1.01019e-06
ENSRNOG00000033433	2872	3.80038	13.2738	1.80437	Up	1.95917e-40	8.38771e-39
ENSRNOG00000033465	623	2242.79	6908.24	1.62302	Up	0	0
ENSRNOG00000033526	2456	6.19258	20.844	1.75102	Up	1.34095e-51	7.79581e-50
ENSRNOG00000033564	827	6.05806	12.1828	1.00792	Up	1.22212e-05	6.30468e-05
ENSRNOG00000033581	2257	36.2298	74.279	1.03578	Up	7.57128e-75	6.3114e-73
ENSRNOG00000033694	1268	1.83445	4.72449	1.36481	Up	1.85826e-05	9.29131e-05
ENSRNOG00000033699	1281	1.46663	4.25141	1.53543	Up	8.3846e-06	4.4448e-05
ENSRNOG00000033711	665	32.4225	15.4237	-1.07185	Down	1.64595e-11	1.71055e-10
ENSRNOG00000033815	801	2.01044	7.70561	1.9384	Up	2.28142e-08	1.71487e-07
ENSRNOG00000033844	709	8.95908	2.43242	-1.88096	Down	2.89274e-08	2.14169e-07
ENSRNOG00000033879	2291	1.13246	3.0903	1.44828	Up	1.10102e-06	6.65132e-06
ENSRNOG00000036585	5066	0.0985293	0.322506	1.7107	Up	0.000195279	0.00080204
ENSRNOG00000036603	1257	3.77217	18.3413	2.28162	Up	1.74937e-33	6.15207e-32
ENSRNOG00000036604	3407	10.1885	25.0164	1.29593	Up	6.19958e-55	3.87597e-53
ENSRNOG00000036627	729	1.71811	7.22156	2.07149	Up	7.27766e-08	5.17417e-07
ENSRNOG00000036762	1608	11.2387	23.1435	1.04213	Up	4.66278e-18	7.76555e-17
ENSRNOG00000036827	1549	1.50166	3.69164	1.2977	Up	5.75422e-05	0.000261714
ENSRNOG00000036833	2445	1.28068	2.93278	1.19536	Up	2.34188e-05	0.000114763
ENSRNOG00000036837	1386	1.09733	3.40542	1.63384	Up	1.46844e-05	7.48231e-05
ENSRNOG00000037206	1477	2.24116	5.28504	1.23767	Up	5.69096e-06	3.0907e-05
ENSRNOG00000037221	831	0.645954	3.27681	2.34279	Up	3.42994e-05	0.000163111
ENSRNOG00000037235	1181	11.8933	25.4395	1.09693	Up	4.96072e-16	7.28389e-15
ENSRNOG00000037299	1992	0.583855	0	-9.18947	Down	0.000135023	0.000572312
ENSRNOG00000037559	3219	2.89044	6.42901	1.15331	Up	2.44208e-12	2.71524e-11
ENSRNOG00000037768	960	3.35492	7.28031	1.11772	Up	7.58884e-05	0.00033746
ENSRNOG00000037951	2588	1.27905	3.78783	1.56629	Up	1.16422e-09	9.99578e-09
ENSRNOG00000038001	1642	2.9422	6.4676	1.13634	Up	7.35938e-07	4.5523e-06
ENSRNOG00000038146	1167	1.22659	4.27782	1.80222	Up	1.78267e-06	1.04642e-05
ENSRNOG00000038384	1254	0	0.868589	9.76253	Up	0.000222166	0.000900032
ENSRNOG00000038821	2101	3.44913	6.95553	1.01193	Up	1.22163e-07	8.48247e-07
ENSRNOG00000038831	312	0	4.65475	12.1845	Up	1.34881e-05	6.90626e-05
ENSRNOG00000038881	1950	4.08326	9.26294	1.18175	Up	2.51244e-11	2.57537e-10
ENSRNOG00000038955	2123	1.76991	4.27544	1.2724	Up	5.6331e-07	3.56138e-06
ENSRNOG00000038999	1569	2.62293	5.32225	1.02086	Up	5.79678e-05	0.000263194
ENSRNOG00000039048	984	0.818274	3.78198	2.20849	Up	2.65666e-06	1.52258e-05
ENSRNOG00000039197	4867	66.1931	139.891	1.07955	Up	0	0
ENSRNOG00000039463	2421	1.44119	3.11182	1.1105	Up	4.34364e-05	0.000202707
ENSRNOG00000039470	1863	1.5367	3.36176	1.12938	Up	0.000160013	0.000667814
ENSRNOG00000039501	249	14.0125	37.9109	1.4359	Up	2.16606e-08	1.63284e-07
ENSRNOG00000039759	1299	1.17082	5.17074	2.14285	Up	4.76482e-10	4.29461e-09
ENSRNOG00000039971	837	10.9025	24.2914	1.15579	Up	3.48636e-12	3.81972e-11
ENSRNOG00000040109	963	1.30063	4.14722	1.67294	Up	5.18192e-05	0.000237744
ENSRNOG00000040287	1632	1.75421	3.8376	1.12938	Up	0.000160013	0.000667991
ENSRNOG00000042035	390	50.4672	118.231	1.22818	Up	3.60592e-28	1.0163e-26
ENSRNOG00000042071	2105	3.99509	1.81104	-1.14141	Down	1.0221e-05	5.3428e-05
ENSRNOG00000042118	3313	1.2962	3.23289	1.31854	Up	2.25934e-08	1.6999e-07
ENSRNOG00000042153	411	14.5843	34.2311	1.23089	Up	1.2141e-09	1.03844e-08
ENSRNOG00000042254	492	1.45471	5.53461	1.92775	Up	0.000247716	0.000993323
ENSRNOG00000042258	836	3.31747	7.27443	1.13275	Up	0.000192893	0.000793687
ENSRNOG00000042316	1089	0.82153	3.16728	1.94686	Up	3.10102e-05	0.000148681
ENSRNOG00000042374	2882	0.620851	1.57473	1.34279	Up	0.000239928	0.000965534
ENSRNOG00000042411	1913	2.05773	4.2703	1.05328	Up	4.50664e-05	0.000209569
ENSRNOG00000042717	1134	2.91904	0.560293	-2.38124	Down	3.91234e-06	2.18191e-05
ENSRNOG00000042771	1429	11.6448	25.7884	1.14704	Up	1.20592e-20	2.31982e-19
ENSRNOG00000042838	1783	25.6402	236.464	3.20514	Up	0	0
ENSRNOG00000042907	357	36.3372	73.987	1.02583	Up	6.00928e-13	7.03912e-12
ENSRNOG00000042959	468	8.98469	18.619	1.05123	Up	2.57556e-05	0.000125318
ENSRNOG00000042960	398	12.588	32.6125	1.37338	Up	2.09622e-10	1.97406e-09
ENSRNOG00000042965	312	9.4626	25.892	1.4522	Up	1.79812e-07	1.21638e-06
ENSRNOG00000043044	390	6.65249	19.7827	1.57227	Up	6.40046e-08	4.57528e-07
ENSRNOG00000043257	770	0.348563	2.947	3.07975	Up	1.28715e-05	6.61201e-05
ENSRNOG00000043286	844	1.90801	6.45267	1.75783	Up	9.23486e-07	5.62844e-06
ENSRNOG00000043314	252	12.4256	30.616	1.30097	Up	2.73618e-06	1.56417e-05
ENSRNOG00000043419	630	1.84609	5.76302	1.64235	Up	0.000142013	0.000599359
ENSRNOG00000043465	3026	0.473045	3.20956	2.76233	Up	3.05642e-18	5.15015e-17
